# Supplementary material
Source: Springer Nature journal article supplement (https://www.springermedizin.de/resource/supplementary/12985_2009_602_MOESM10_ESM.pdf/9608544)

0.002

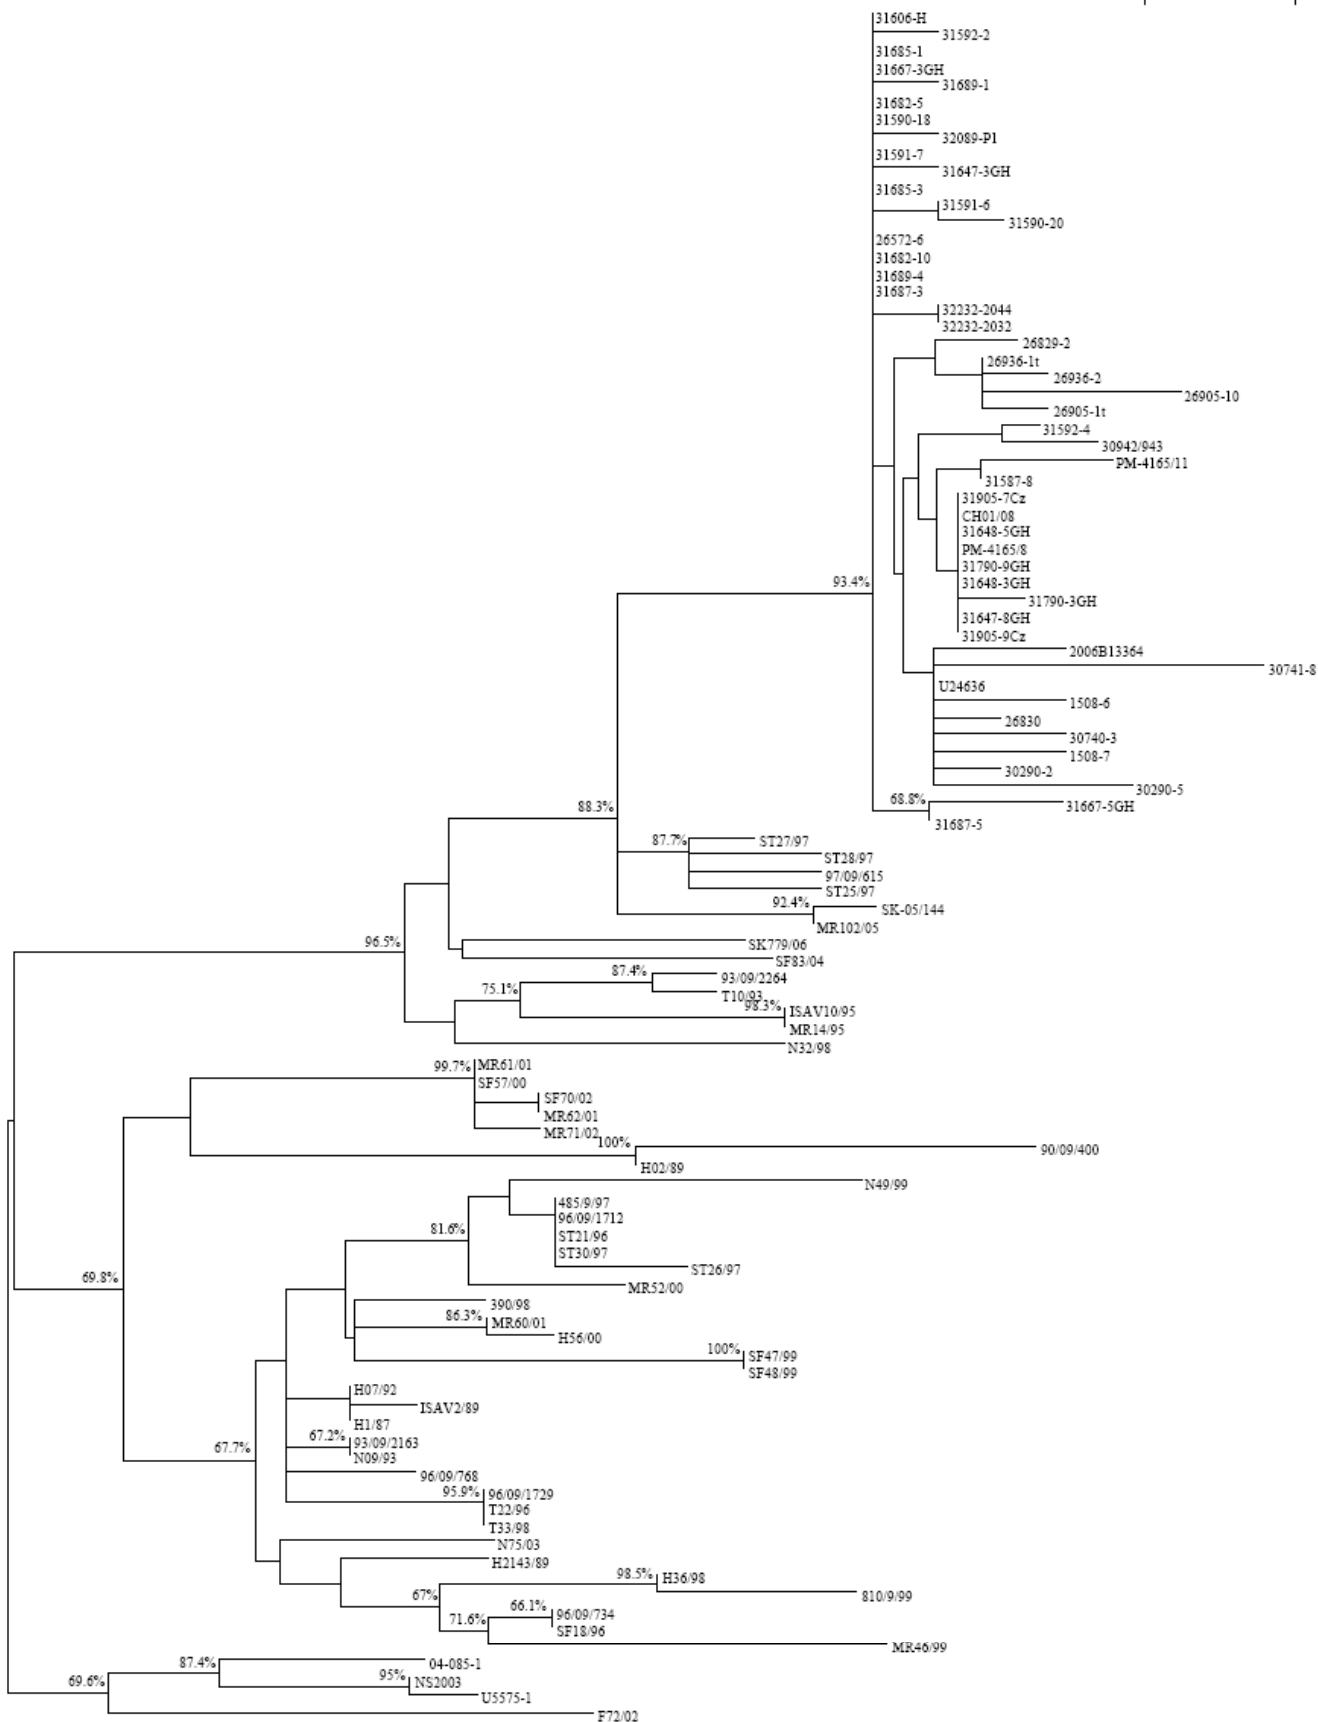

Supplement: MOESM10 [file 9608544]
